# Supplementary material
Source: Springer Nature journal article supplement (https://www.springermedizin.de/resource/supplementary/12877_2013_966_MOESM3_ESM.pdf/9440800)

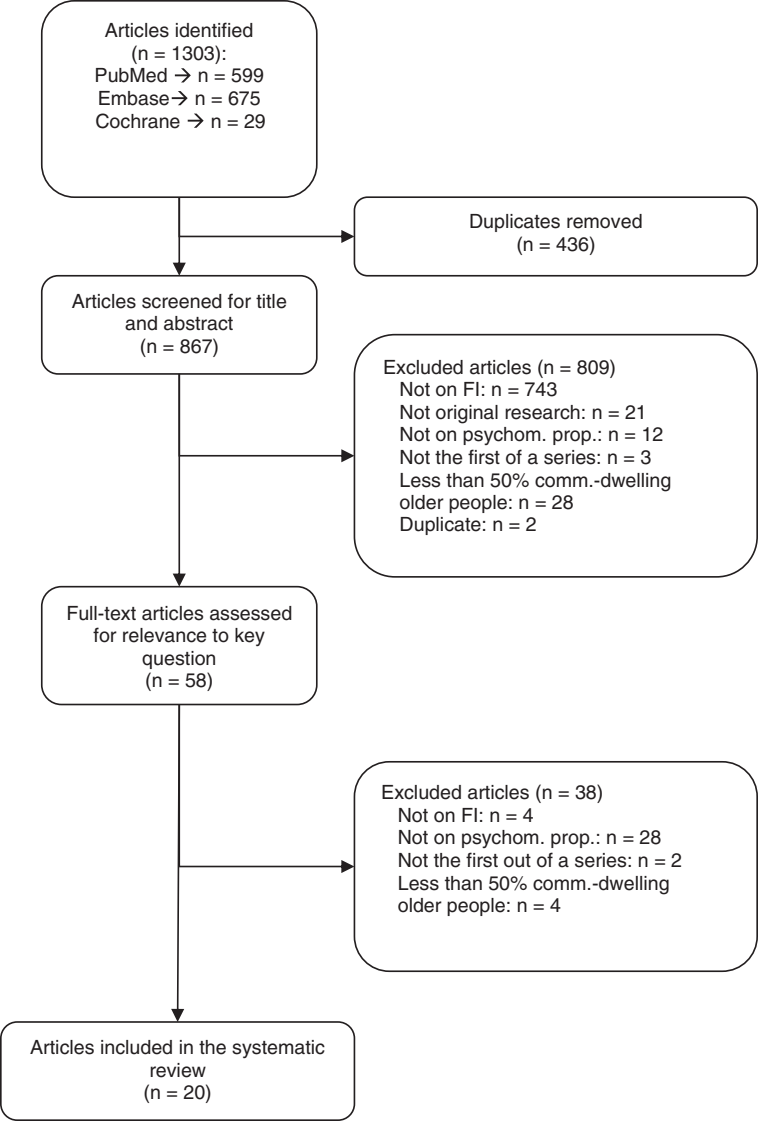

Supplement: MOESM3 [file 9440800]
